# Supplementary material for: Chromatin accessibility in the Drosophila embryo is determined by transcription factor pioneering and enhancer activation
Source: PubMed Central journal article supplement — Dev Cell. Author manuscript; Available in PMC 2023 Oct 23. (PMC10592203; doi:10.1016/j.devcel.2023.07.007), 2023-08-08
Supplement: NIHMS1923924-supplement-MMC1.pdf [file NIHMS1923924-supplement-MMC1.pdf]

Developmental Cell, Volume 58

**Supplemental information**

**Chromatin accessibility in the *Drosophila* embryo  
is determined by transcription factor pioneering  
and enhancer activation**

**Kaelan J. Brennan, Melanie Weilert, Sabrina Krueger, Anusri Pampari, Hsiao-yun Liu, Ally W.H. Yang, Jason A. Morrison, Timothy R. Hughes, Christine A. Rushlow, Anshul Kundaje, and Julia Zeitlinger**

**A**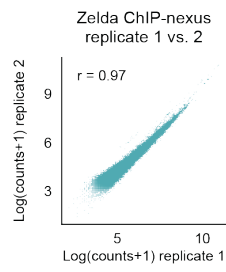**ChIP-nexus replicate correlation**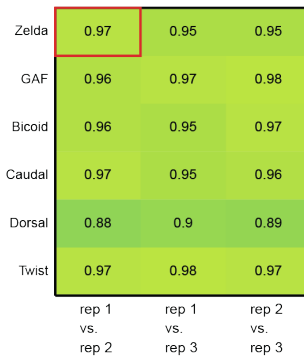**B****wt ATAC-seq replicate correlation**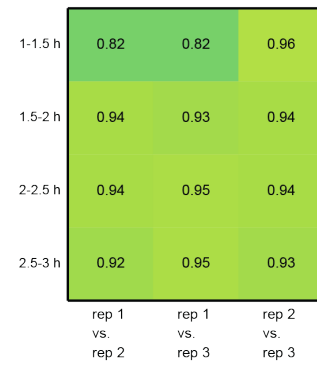**C****zld ATAC-seq replicate correlation**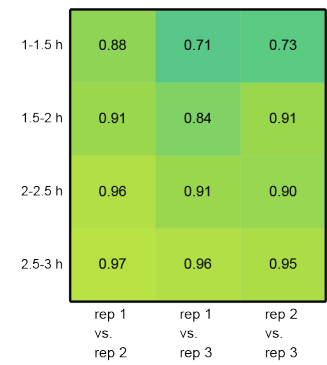**D****MNase-seq replicate correlation**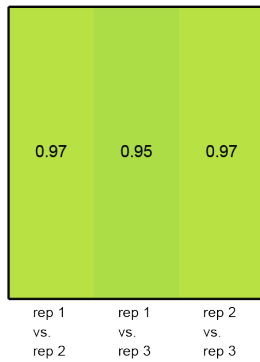**E****ChIP-seq replicate correlation**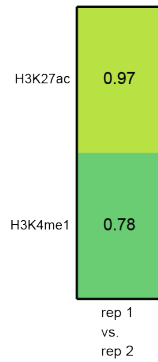**F****gd<sup>l</sup> ATAC-seq replicate correlation**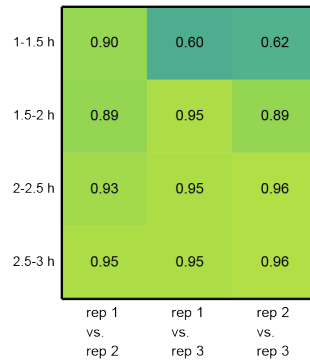**G****cic<sup>6</sup> ATAC-seq replicate correlation**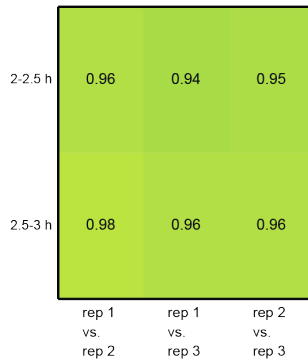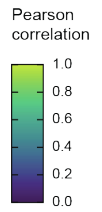

**Figure S1 | ChIP-nexus, ATAC-seq, MNase-seq, and ChIP-seq replicates are highly correlated (related to Figures 1-5).**

Pearson correlation values were determined for all pairwise comparisons between replicates of (A) TF ChIP-nexus experiments, (B) *wt* time course ATAC-seq experiments, (C) *zld*<sup>Δ</sup> time course ATAC-seq experiments, (D) MNase-seq experiments, (E) histone ChIP-seq experiments, (F) *gd7* time course ATAC-seq experiments, and (G) *cic*<sup>Δ</sup> time course ATAC-seq experiments. The Zelda ChIP-nexus replicates 1 and 2 correlation plot is shown as an example of how Pearson correlation values were derived. For ChIP-nexus, coverage for each replicate was calculated across a 400 bp window centered on the MACS2-called peaks for each TF. Because ChIP-nexus provides strand-specific information, the absolute value of the counts from the negative strand, which would otherwise be negative, was taken and added to the counts across the positive strand to determine the total region counts for a given replicate. For ATAC-seq, counts for each replicate were calculated across a 400 bp window centered on the MACS2-called peaks for each time point. For ChIP-seq, counts for each replicate were calculated across a 1000 bp window centered on the MACS2-called peaks for each histone mark. For MNase-seq, counts for each replicate were calculated across a 1000 bp window centered on *Drosophila* transcription start sites.

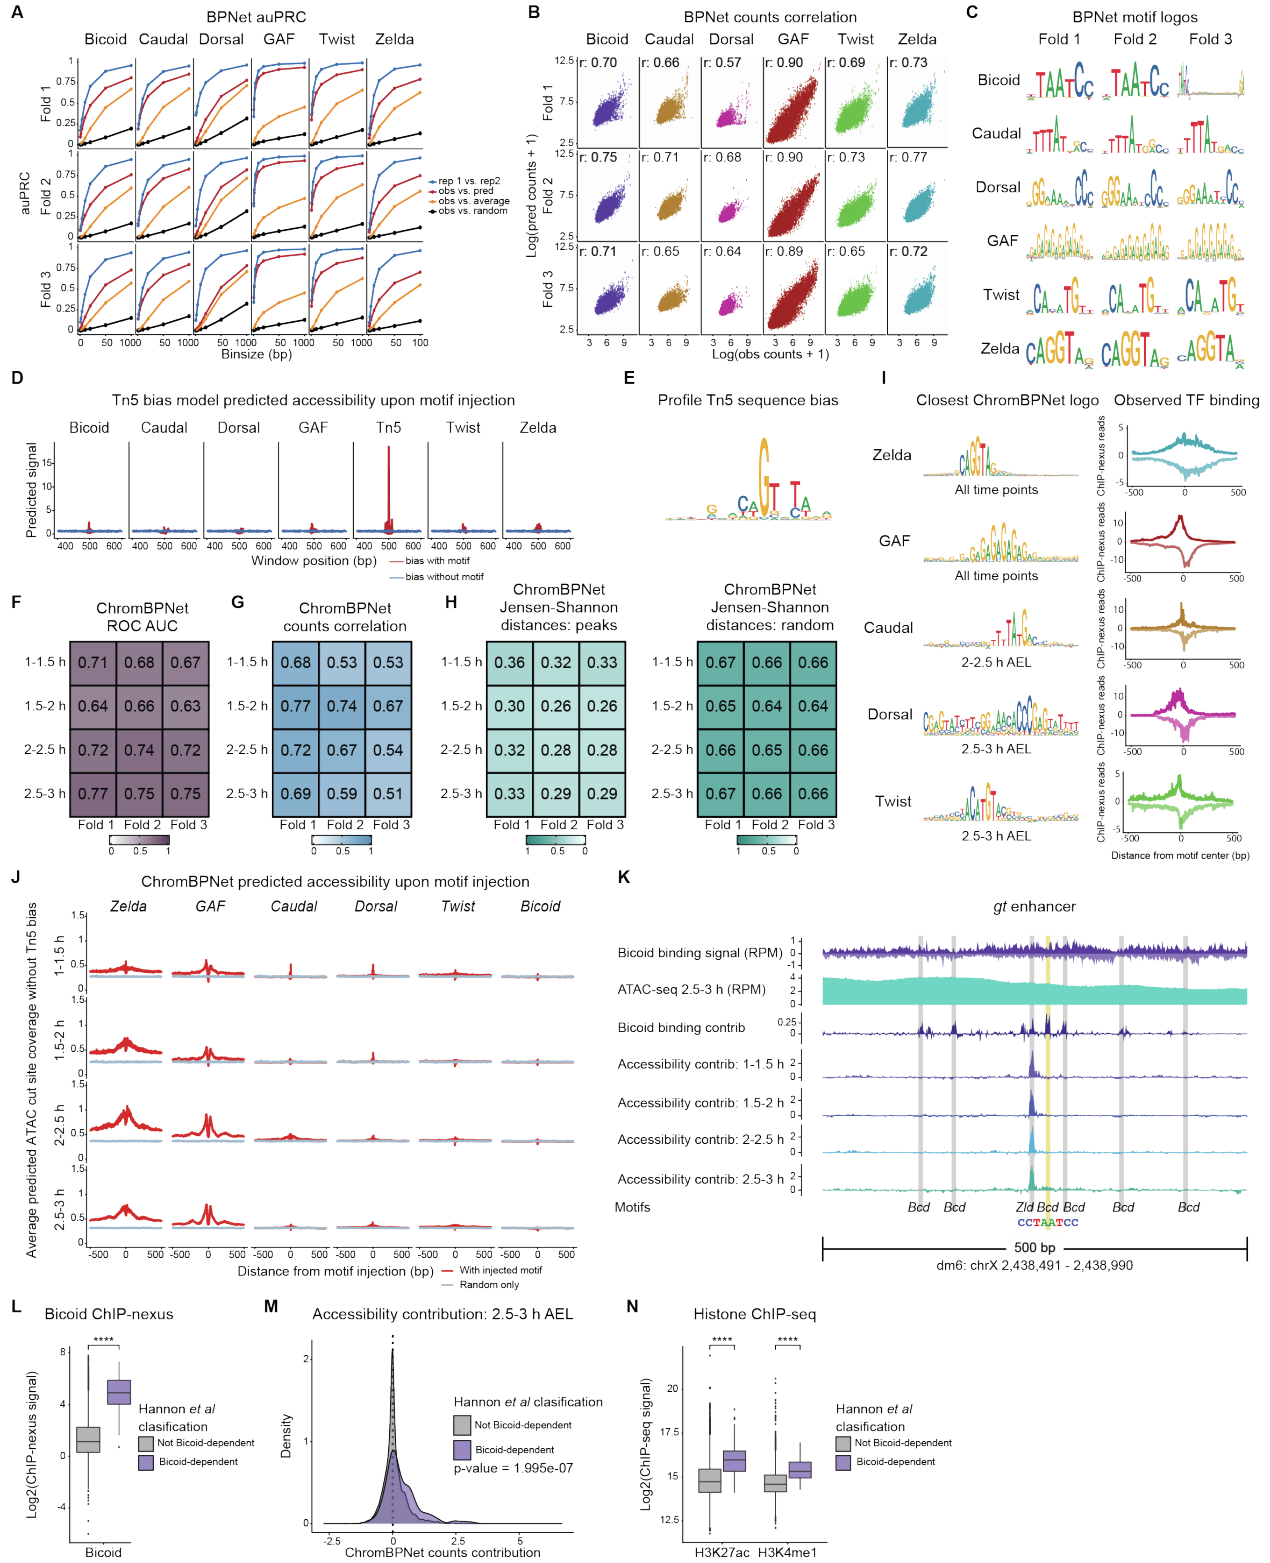

**Figure S2 | Deep learning models accurately learn TF ChIP-nexus and time course chromatin accessibility information in the early *Drosophila* embryo (related to Figures 1 and 2).**

(A) Area under the Precision-Recall Curves (auPRC) show that BpNet predicts the profile positions with high accuracy. The ability of BpNet to identify positions of high ChIP-nexus signal is assessed at various resolutions up to 100 bp. Replicate experiments, average ChIP-nexus profiles, and randomized profiles are shown as controls. Three-fold validation was performed by applying the same model architecture from the original, optimized model (fold 1) to two additional models (fold 2 and fold 3) with the training, validation, and test chromosomes shuffled. These results show that the training regions are representative of the entire dataset and that the trained BpNet model is highly stable. (B) BpNet predicts ChIP-nexus counts with high accuracy. Pearson counts correlation values were determined by comparing the observed ChIP-nexus counts with BpNet's predicted counts at ChIP-nexus peaks for each of the TFs of interest. The stability of BpNet's counts predictions were assessed with three-fold validation. (C) BpNet re-discovered the known motifs for all TFs of interest irrespective of the distribution of the training, validation, and test chromosomes. BpNet CWMs are shown for each TF for the original optimized model (fold 1) and the additional models trained with the same architecture as part of three-fold validation (fold 2 and fold 3). (D) The Tn5 bias ChromBpNet model does not learn TF motif sequence grammar. The canonical sequences for each TF of interest were injected into 256 genomic sequences from ChromBpNet's test chromosome (chrX) and the Tn5 bias model was used to predict chromatin accessibility cut site signal. The effects were averaged across trials and show no predicted accessibility upon injection of any motif except the Tn5 preferred sequence. This confirms that the bias model's learning was limited to Tn5 bias and did not learn cis-regulatory grammar. (E) TF-MoDISco interpretations returned Tn5 sequence bias as the top Tn5 logo for profile contribution but not for counts contribution. These results show that the bias model only learned Tn5 positional information and was successfully trained to only represent Tn5 bias at closed genomic regions. (F) The time course ChromBpNet models accurately discriminates between ATAC-seq peak and non-peak regions. The models' predictions were assessed using area under the receiver operating characteristic curves (ROC AUC). Three-fold validation was performed by applying the original ChromBpNet architecture (fold 1) to two additional models with reshuffled training, test, and validation chromosome sets (fold 2 and fold 3). (G) The time course ChromBpNet models accurately predict chromatin accessibility counts. Pearson correlation values were calculated by comparing the observed ATAC-seq cut sites with the ChromBpNet predicted cut sites at ATAC-seq peak regions for all time points. (H) The time course ChromBpNet models have high profile prediction accuracy. Time course profile predictions were assessed by comparing to the observed ATAC-seq cut sites using Jensen-Shannon distances at peak regions, where lower values are better. Randomly shuffled region profiles were included as a control. (I) ChromBpNet identifies TF motifs in ATAC-seq data that are bound by their respective TFs. TF-MoDISco was run on all ChromBpNet models and sequence features with high counts contribution were consolidated into motifs. The closest motif logo for each TF of interest was manually identified with the exception of Bicoid, which ChromBpNet did not identify in the ATAC-seq data. Motifs for the pioneering TFs were unambiguous and identified at all time points, while the patterning TF motifs deviated from the BpNet-identified binding motifs for Caudal, Dorsal, and Twist and were identified only at later time points. Average observed ChIP-nexus binding profiles showed clear TF footprints on all motifs. Average footprints were anchored on and calculated across the accessibility-identified motifs for each TF. (J) ChromBpNet predicts time course chromatin accessibility in response to TF motif injection. The TF binding motifs identified by BpNet were injected into 512 randomized sequences. The ChromBpNet models were used to make chromatin accessibility cut site predictions before (blue) and after (red) TF motif injection, with the predicted effect centered on the injected motif. The predictions were averaged for all trials and show that pioneering motifs

have the largest predicted effect on chromatin accessibility. **(K)** The Bicoid motif contribution to chromatin accessibility increases over developmental time. Bicoid ChIP-nexus coverage (top track), 2.5-3 h ATAC-seq fragment coverage (second track), BPNNet predicted counts contribution for Bicoid binding (third track), and the normalized ChromBPNNet counts contribution for each time point (last four tracks) were plotted across the *gt* enhancer<sup>1</sup>. The central Bicoid motif (yellow) contributes to chromatin accessibility and does so most strongly at the latest time point. **(L)** Bicoid motifs that depend on Bicoid for chromatin accessibility are more bound by Bicoid. BPNNet-mapped Bicoid motifs were overlapped with genomic regions previously described as dependent on Bicoid for chromatin accessibility<sup>2</sup> and categorized as Bicoid-dependent (n = 162) or Bicoid-independent (n = 5643). Bicoid ChIP-nexus signal was calculated in a 100 bp window surrounding each Bicoid motif instance for both Bicoid-dependent and Bicoid-independent motifs. The Wilcoxon rank-sum test was used to determine statistical significance between Bicoid-dependent and Bicoid-independent motifs (\*\*\*\* = p < 0.0001). **(M)** Bicoid motifs that depend on Bicoid for chromatin accessibility have higher accessibility contributions. The ChromBPNNet counts contribution from the 2.5-3 h ATAC-seq time point was plotted for the two populations of Bicoid motifs, and the Kolmogorov-Smirnov test was performed and demonstrated a statistically significant (p = 1.99e-07) difference in accessibility contribution between Bicoid-dependent and Bicoid-independent motifs. **(N)** Bicoid motifs that depend on Bicoid for chromatin accessibility are more associated with features of enhancer activation. H3K27ac and H3K4me1 ChIP-seq signal was calculated in a 500 bp window surrounding each Bicoid motif instance for both Bicoid-dependent and Bicoid-independent motifs. The Wilcoxon rank-sum test demonstrated statistical significance between Bicoid-dependent and Bicoid-independent motifs for both histone modifications (\*\*\*\* = p < 0.0001), further suggesting that Bicoid's contribution to chromatin accessibility comes from enhancer activation.

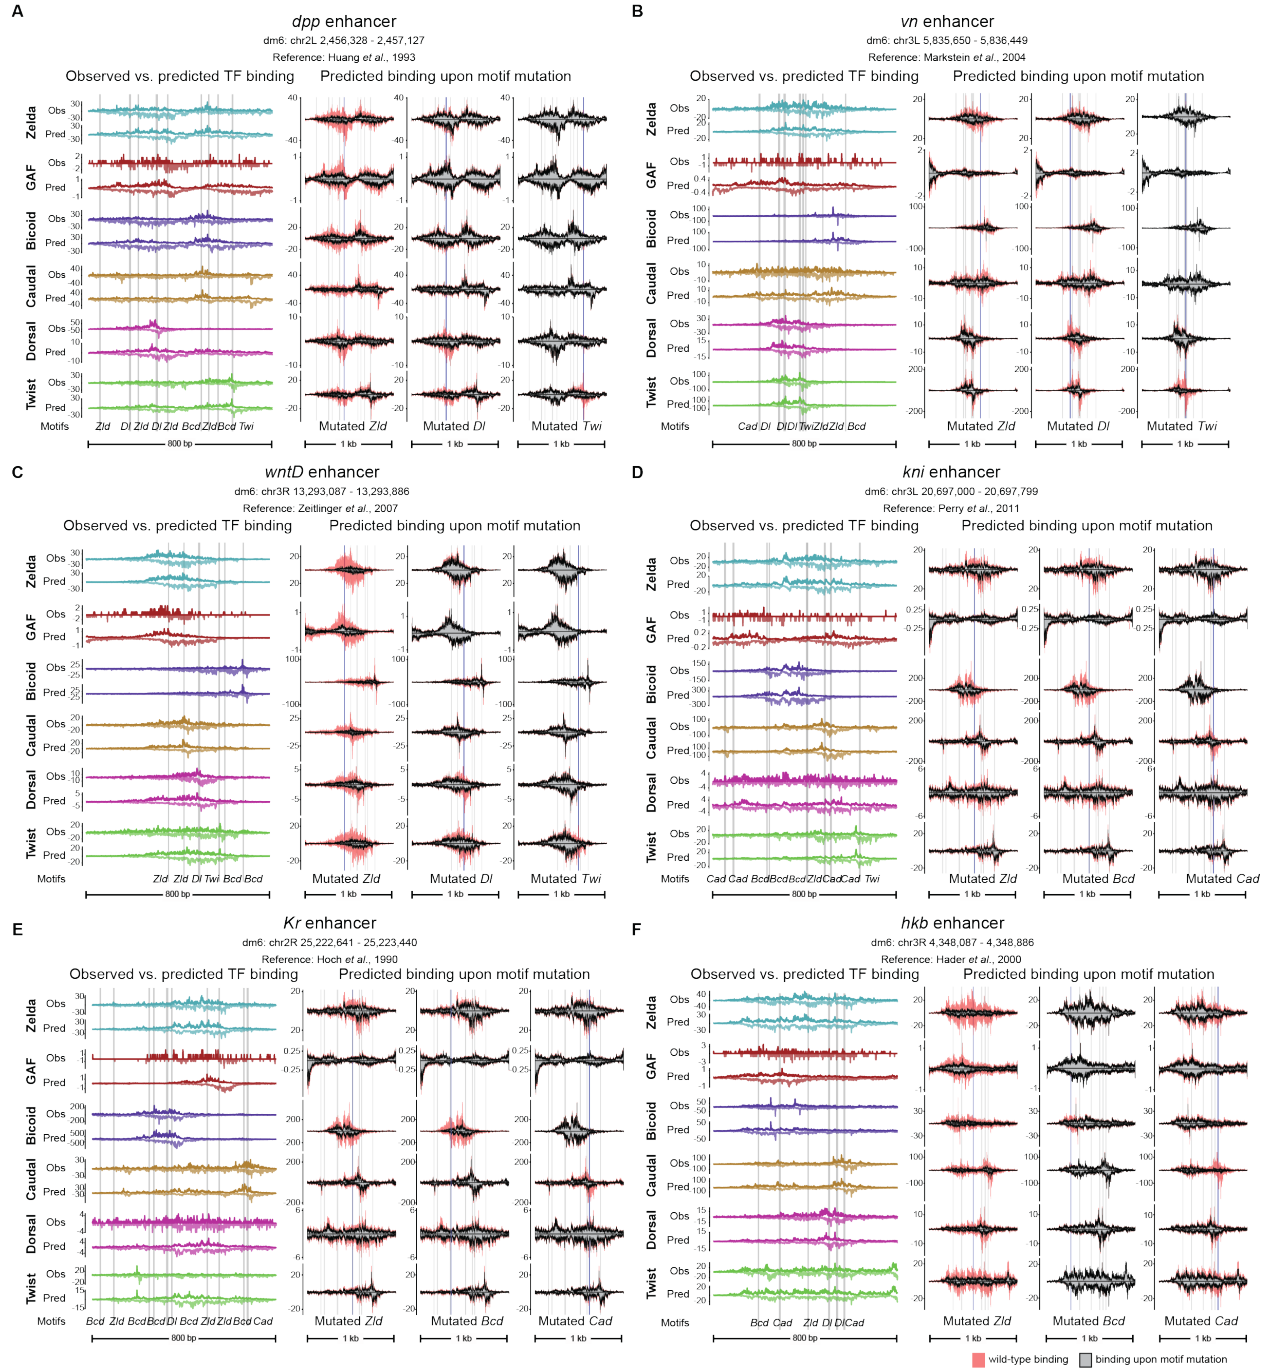

**Figure S3 | BpNet accurately maps TF motifs and predicts TF binding upon motif mutation at known *Drosophila* enhancers (related to Figure 1).**

As in Figure 1D, the experimentally generated ChIP-nexus (top track) and BpNet predicted ChIP-nexus data (bottom track) for each TF (different colors) are plotted at known enhancers for the following genes: **(A)** *dpp*<sup>3</sup>, **(B)** *vn*<sup>4</sup>, **(C)** *wntD*<sup>5</sup>, **(D)** *kni*<sup>6</sup>, **(E)** *Kr*<sup>7</sup>, and **(F)** *hkb*<sup>8</sup>. Motifs were discovered and mapped by BpNet. Enhancers across different developmental patterns and axes were deliberately selected for showcasing BpNet's predictive accuracy. As in Figure 1G, BpNet predicted the binding of all TFs at *wt* enhancer sequences and again at enhancers upon individual motif mutations for the following enhancers: **(A)** *dpp*, **(B)** *vn*, **(C)** *wntD*, **(D)** *kni*, **(E)** *Kr*, and **(F)** *hkb*. Shaded colors show TF binding across the *wt* enhancer, while the gray-filled profiles represent TF binding in response to the motif mutation. Blue bars indicate the mutated motifs that are highlighted under the predictions, and the gray bars are all other BpNet-mapped motifs across the enhancers.





**Figure S4 | ChromBPNet predicts time course chromatin accessibility at known enhancers and identifies the TF motif contribution to accessibility (related to Figure 2).**

As in Figure 2C, the experimentally generated ATAC-seq data (tracks one and two) are shown with ChromBPNet accessibility predictions with Tn5 bias (track three) and without Tn5 bias (track four) for known enhancers for the following genes: (A) *dpp*, (B) *vn*, (C) *kni*, and (D) *Kr*. Columns represent model predictions at each of the four ATAC-seq time points. The counts contribution for chromatin accessibility across each enhancer is shown as the fifth track, with spikes at BPNet-mapped TF motifs. TF motifs are highlighted with the colored bars. At the same enhancers (E) *dpp*, (F) *vn*, (G) *kni*, and (H) *Kr*, ChromBPNet predicted chromatin accessibility cut sites without Tn5 bias for all time points at *wt* enhancer sequences and when individual motifs are mutated, as in Figure 2D. Shaded colors show chromatin accessibility predictions across the *wt* enhancer sequence, and the gray-filled profiles represent chromatin accessibility upon mutation of the highlighted motif (blue bar). Gray bars are non-mutated motifs across each enhancer.

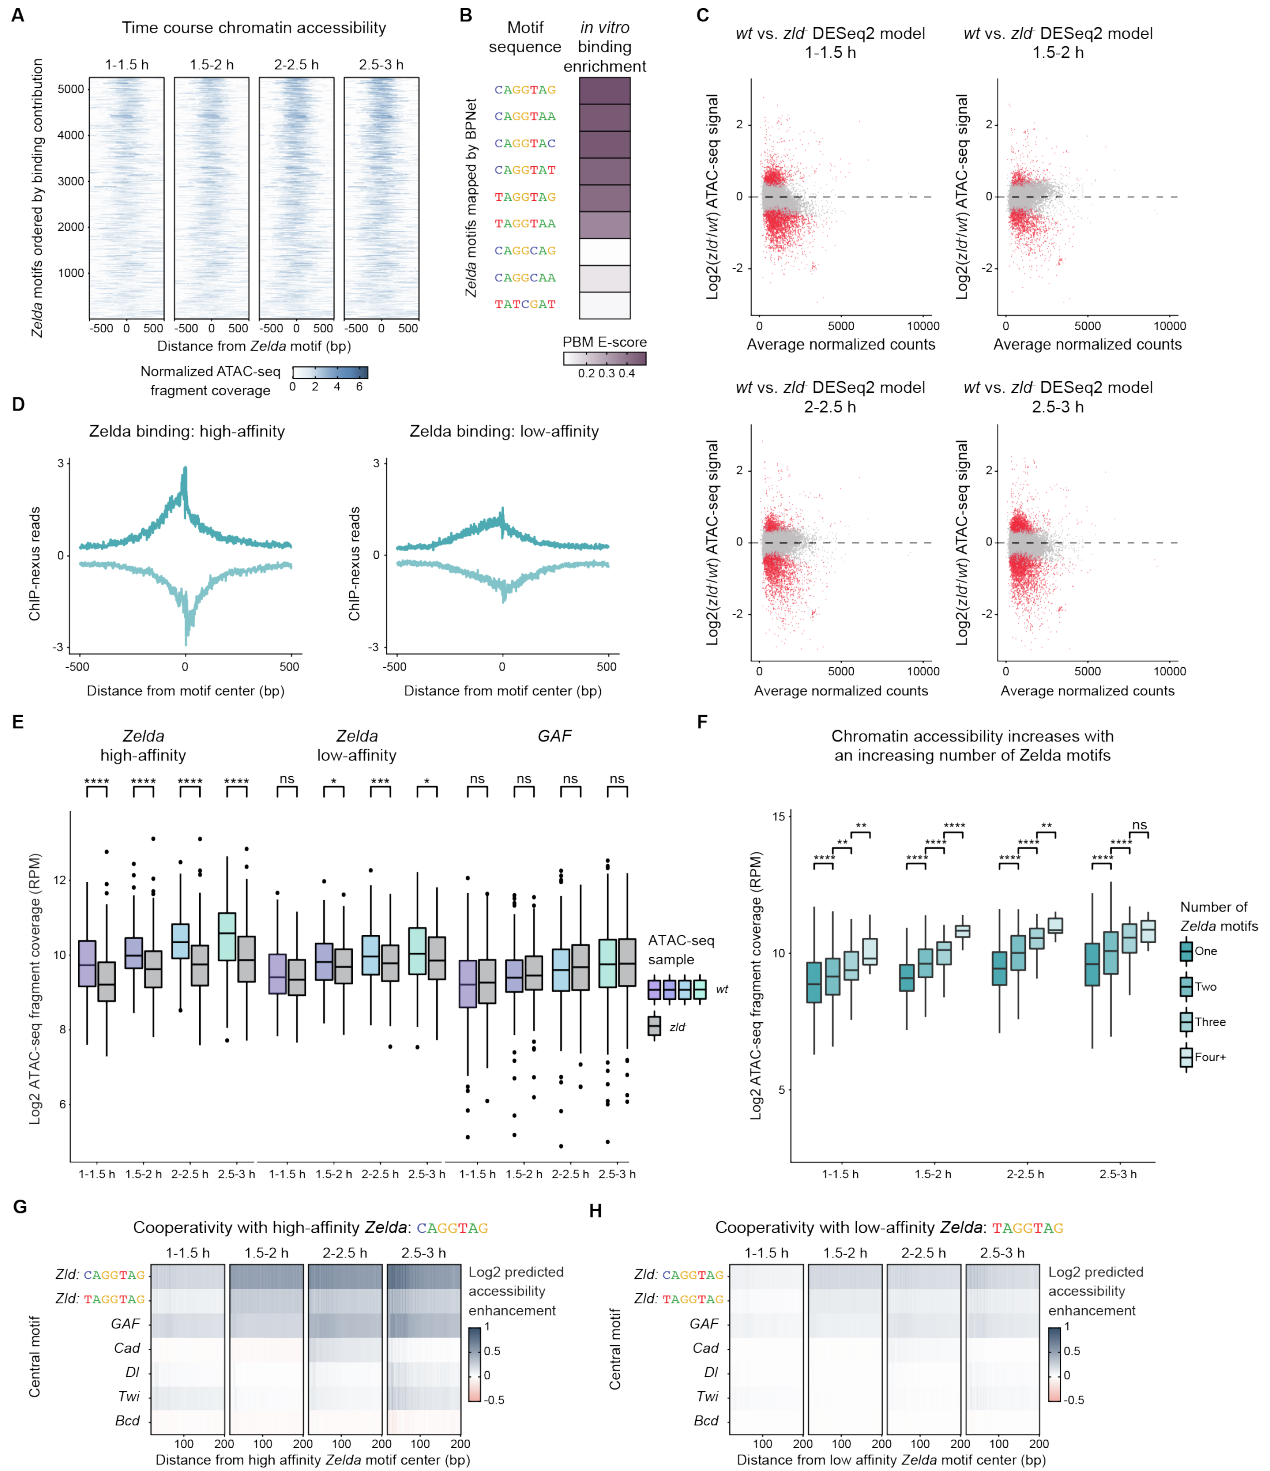

**Figure S5 | High-affinity Zelda motifs have greater effects on chromatin accessibility than low affinity Zelda motifs (related to Figure 3).**

(A) Time course chromatin accessibility correlates with Zelda motif binding contribution. BPNet-mapped Zelda motifs were ordered by their counts contribution scores for Zelda binding as in Figure 3A. The experimentally generated ATAC-seq signal was calculated across a 1000 bp window, anchored on the Zelda motif, for each time point. The Zelda motifs that contribute most strongly to Zelda binding exhibit the highest chromatin accessibility. (B) Protein binding microarray (PBM) E-scores show differences between high- and low-affinity Zelda motifs. The E-score is a rank-based PBM statistic that is a variation on the area under the receiver operating characteristic curve (AUC) that ranges from -0.5 (lowest) to 0.5 (highest)<sup>9</sup>. E-scores for each Zelda heptad were calculated as done in Figure 3B. (C) Time course MA plots show differential chromatin accessibility between *wt* and *zld* embryos. The differential chromatin accessibility was calculated between *wt* and *zld* embryos using DESeq2 for all time points. Red highlighted dots are ATAC-seq peaks that are differentially accessible with statistical significance (FDR = 0.05). (D) Zelda is more strongly bound to high-affinity motifs than to low-affinity motifs. Average Zelda binding footprints were calculated and plotted across the same high- and low-affinity Zelda motifs as in Figure 3F. Average profiles were calculated across a 1000 bp window and were anchored on Zelda motifs. (E) Low-affinity Zelda motifs have a weaker effect on chromatin accessibility than high-affinity Zelda motifs. The average profiles in Figure 3F were quantified using boxplots and were tested for statistical significance using the Wilcoxon rank-sum test (\* =  $p < 0.05$ ; \*\* =  $p < 0.01$ ; \*\*\* =  $p < 0.001$ ; \*\*\*\* =  $p < 0.0001$ ). Observed ATAC-seq fragment coverage was calculated across a 500 bp window centered on each Zelda motif using the same motif instances as in Figure 3F. There is an average of a five-fold weaker effect from low-affinity motifs than from high-affinity motifs, which was calculated using median values for accessibility for *wt* and *zld* embryos at all time points. (F) Greater chromatin accessibility is associated with regions with more mapped Zelda motifs. All Zelda-containing islands were collected and separated based on how many Zelda motifs they contained. The observed normalized ATAC-seq fragment coverage for each time point was calculated across a 250 bp window anchored on the island center. Statistical significance was determined using the Wilcoxon rank-sum test (\* =  $p < 0.05$ ; \*\* =  $p < 0.01$ ; \*\*\* =  $p < 0.001$ ; \*\*\*\* =  $p < 0.0001$ ). These results show that more Zelda motifs across a genomic region correlates with increased chromatin accessibility. This is consistent with previous results showing higher levels of nucleosome depletion for more Zelda motifs<sup>10</sup>. (G, H) ChromBPNet predicts that high-affinity Zelda motifs induce greater chromatin accessibility than low-affinity Zelda motifs. *In silico* motif injections into randomized sequences were performed as in Figure 3H, except the ChromBPNet models were used to predict chromatin accessibility at TF motifs upon injection of a (G) high-affinity or (H) low-affinity Zelda motif for each time point. Motif injections were repeated 512 times and predictions were averaged.

**A**

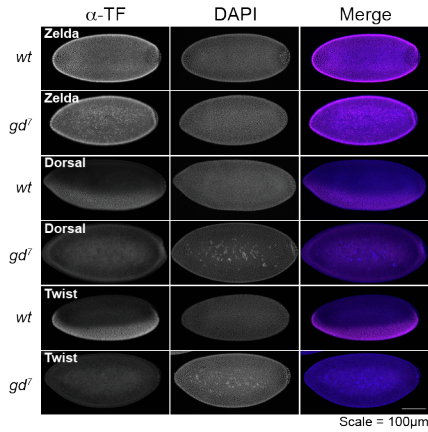

**C**

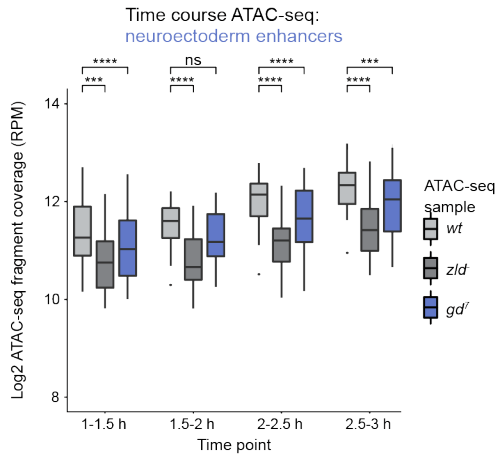

**B**

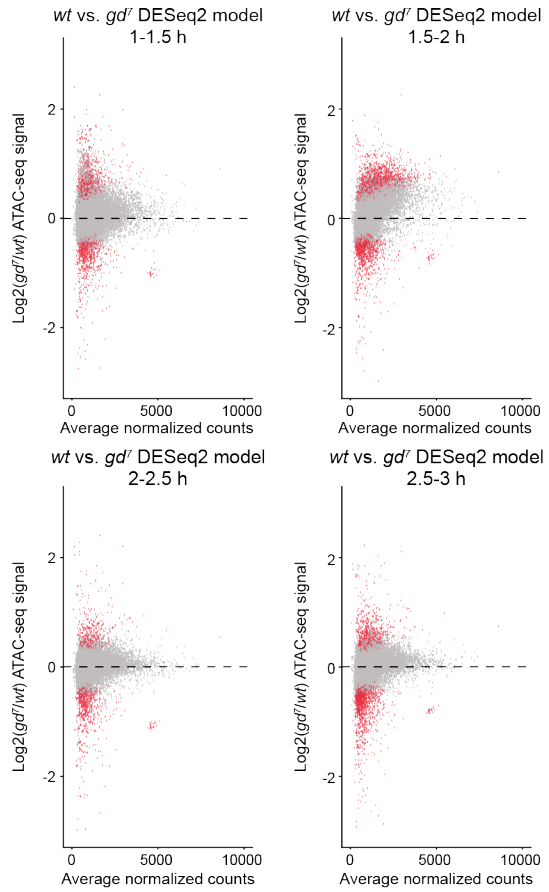

**D**

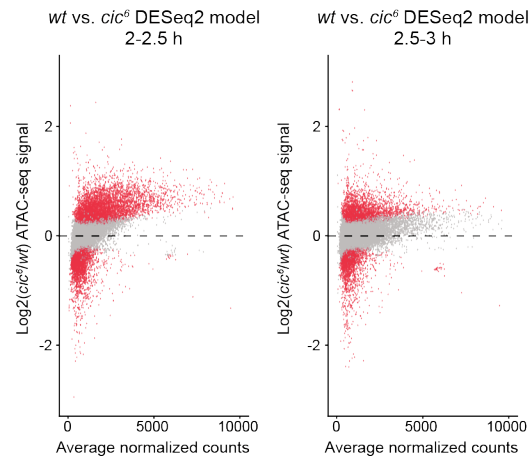

**E**

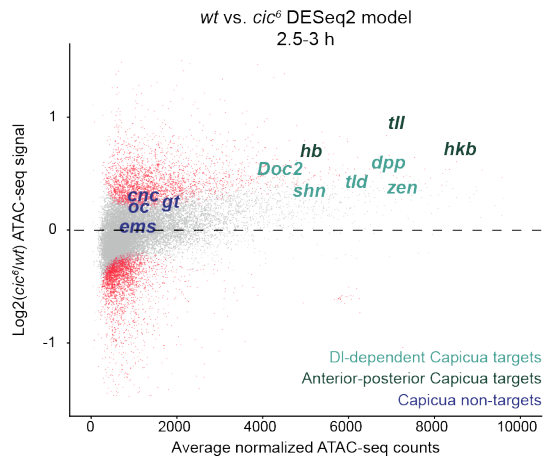

**F**

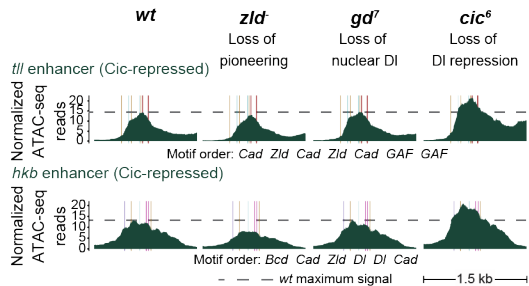

**G**

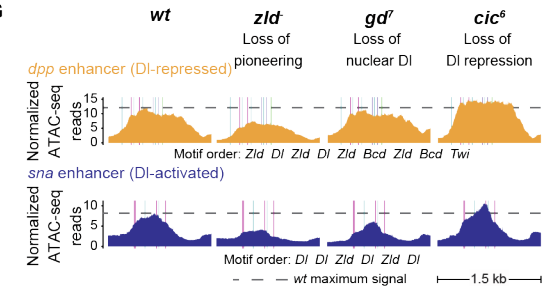

**Figure S6 | Chromatin accessibility changes context-specifically in *gd<sup>7</sup>* and *cic<sup>6</sup>* embryos (related to Figure 5).**

(A) *gd<sup>7</sup>* embryos show a clear loss of dorsoventral patterning. Nuclear cycle 14 embryos were stained using the same Zelda, Dorsal, and Twist antibodies used in ChIP-nexus experiments. Confocal images of *wt* and *gd<sup>7</sup>* embryos were collected using the same settings, maximum intensity projected, and processed in FIJI using the identical settings. (B) Time course MA plots show differential chromatin accessibility between *wt* and *gd<sup>7</sup>* embryos. DESeq2 was used to determine differential chromatin accessibility for all time points, and the red points represent the ATAC-seq peaks that are significantly differentially expressed (FDR = 0.05). (C) Neuroectoderm enhancers lose chromatin accessibility in *gd<sup>7</sup>* embryos. The normalized ATAC-seq fragment coverage was calculated in *wt*, *zld<sup>1</sup>*, and *gd<sup>7</sup>* embryos across known neuroectoderm enhancers ( $n = 23$ )<sup>5,11</sup> as in Figures 5C and 5D. Wilcoxon rank-sum tests were used to test for statistical significance (\*\* =  $p < 0.001$ ; \*\*\*\* =  $p < 0.0001$ ). In *gd<sup>7</sup>* embryos, neuroectoderm enhancers are inactive. (D) MA plots show differential chromatin accessibility between *wt* and *cic<sup>6</sup>* embryos at 2-2.5 h AEL and 2.5-3 h AEL. DESeq2 was run on *wt* and *cic<sup>6</sup>* embryos for both time points to determine the differential chromatin accessibility. ATAC-seq peaks that are significantly differentially accessible are highlighted in red (FDR = 0.05). (E) In *cic<sup>6</sup>* embryos, chromatin accessibility is increased at Capicua-repressed anterior-posterior patterning enhancers. In *wt* embryos, Capicua represses known anterior-posterior enhancers (e.g., *hb*, *tll*, *hkb*) in a Dorsal-independent fashion by binding high-affinity Capicua motifs<sup>12</sup>. Differential chromatin accessibility analysis was performed between *wt* and *cic<sup>6</sup>* embryos as in Figure 5E. Both Dorsal-dependent (teal) and Dorsal-independent (green) enhancers gain accessibility in *cic<sup>6</sup>* embryos, while enhancers not bound by Capicua (blue) do not. (F) Summary of chromatin accessibility at two Dorsal-independent Capicua-repressed enhancers (*tll* and *hkb*) upon loss of Zelda, nuclear Dorsal, and Dorsal-mediated repression as in Figure 5F. The dm6 enhancer coordinates are chr3R 30,851,400 - 30,852,900 for *tll*<sup>13</sup> and chr3R 4,347,821 - 4,349,321 for *hkb*<sup>8</sup>. Both enhancers do not significantly change accessibility in *gd<sup>7</sup>* embryos but do show increased accessibility in *cic<sup>6</sup>* as they are de-repressed. (G) Summary of chromatin accessibility at a Dorsal-repressed enhancer (*dpp*)<sup>3</sup> and Dorsal-activated enhancer (*sna*)<sup>14</sup> upon loss of Zelda, nuclear Dorsal, and Dorsal-mediated repression as in figure 5F. The dm6 enhancer coordinates are chr2L 2,456,160 - 2,457,660 (*dpp*) and chr2L 15,479,300 - 15,480,800 (*sna*).

**Table S1 | Motif island summary statistics (related to Figure 4)**

| Number of each island type |        |
|----------------------------|--------|
| Island composition         | Number |
| <i>Bcd</i>                 | 7036   |
| <i>Bcd Cad</i>             | 404    |
| <i>Bcd Cad Dl Zld</i>      | 31     |
| <i>Bcd Cad Twi</i>         | 135    |
| <i>Bcd Cad Twi Zld</i>     | 43     |
| <i>Bcd Cad Zld</i>         | 107    |
| <i>Bcd Dl</i>              | 75     |
| <i>Bcd Dl Twi</i>          | 69     |
| <i>Bcd Dl Twi Zld</i>      | 32     |
| <i>Bcd Dl Zld</i>          | 43     |
| <i>Bcd GAF</i>             | 214    |
| <i>Bcd GAF Twi</i>         | 78     |
| <i>Bcd Twi</i>             | 981    |
| <i>Bcd Twi Zld</i>         | 161    |
| <i>Bcd Zld</i>             | 393    |
| <i>Cad</i>                 | 6405   |
| <i>Cad Dl</i>              | 64     |
| <i>Cad Dl Twi</i>          | 59     |
| <i>Cad GAF</i>             | 244    |
| <i>Cad GAF Twi</i>         | 107    |
| <i>Cad Twi</i>             | 867    |
| <i>Cad Twi Zld</i>         | 72     |
| <i>Cad Zld</i>             | 268    |
| <i>Dl</i>                  | 449    |
| <i>Dl GAF</i>              | 33     |
| <i>Dl Twi</i>              | 235    |
| <i>Dl Twi Zld</i>          | 75     |
| <i>Dl Zld</i>              | 70     |
| <i>GAF</i>                 | 4136   |
| <i>GAF Twi</i>             | 681    |
| <i>GAF Twi Zld</i>         | 46     |
| <i>GAF Zld</i>             | 141    |
| <i>Twi</i>                 | 11763  |
| <i>Twi Zld</i>             | 366    |
| <i>Zld</i>                 | 1673   |
| Island summary statistics  |        |
| Minimum                    | 200    |
| 1st quartile               | 200    |
| Median                     | 200    |
| Mean                       | 245    |
| 3rd quartile               | 266    |
| Maximum                    | 945    |

Summary of motif islands generated according to the scheme in Figure 4A. Only motifs identified and mapped by BpNet and that are bound by their associated TF are used for island generation. Islands with fewer than 30 genomic instances are excluded. Motif islands are not separated according to how many motifs they contain but are instead classified based on which TF motifs compose them. Summary statistics for motif islands show that islands are approximately the sizes as *Drosophila* enhancers, with no island greater than 945 bp. Islands that are 200 bp wide are single-motif islands.

**Table S2 | Oligonucleotides used for ChIP-nexus (related to STAR Methods).**

| Name          | Identity              | Modification                 | Barcode          | Sequence                                                                                  |
|---------------|-----------------------|------------------------------|------------------|-------------------------------------------------------------------------------------------|
| Nex_adapter_U | Adaptor:<br>universal | 5' phosphate                 | /                | <u>/5Phos</u> /GATCGGAAGAGCACACGTCTG<br>GATCCACGACGCTCTTCC                                |
| Nex_adapter_1 | Adaptor:<br>barcoded  | 5' phosphate                 | <u>AGTCNNNNN</u> | <u>/5Phos</u> / <u>AGTCNNNNN</u> NAGATCGGAAGAG<br>CGTCGTGGATCCAGACGTGTGCTCTT<br>CCGATCT   |
| Nex_adapter_2 | Adaptor:<br>barcoded  | 5' phosphate                 | <u>CAGTNNNNN</u> | <u>/5Phos</u> / <u>CAGTNNNNN</u> NAGATCGGAAGAG<br>CGTCGTGGATCCAGACGTGTGCTCTT<br>CCGATCT   |
| Nex_adapter_3 | Adaptor:<br>barcoded  | 5' phosphate                 | <u>GTCANNNNN</u> | <u>/5Phos</u> / <u>GTCANNNNN</u> NAGATCGGAAGAG<br>CGTCGTGGATCCAGACGTGTGCTCTT<br>CCGATCT   |
| Nex_adapter_4 | Adaptor:<br>barcoded  | 5' phosphate                 | <u>TCAGNNNNN</u> | <u>/5Phos</u> / <u>TCAGNNNNN</u> NAGATCGGAAGAG<br>CGTCGTGGATCCAGACGTGTGCTCTT<br>CCGATCT   |
| Nex_primer_U  | Primer:<br>universal  | 3' phosphoro-thioate<br>bond | /                | AATGATACGGCGACCACCGAGATCTA<br>CACTCTTTCCCTACACGACGCTCTTC<br>CGATC*T                       |
| Nex_primer_01 | Primer:<br>indexed    | 3' phosphoro-thioate<br>bond | <u>ATCACG</u>    | CAAGCAGAAGACGGCATAACGAGAT <u>CG</u><br><u>TGATGTGACTGGAGTTCAGACGTGTG</u><br>CTCTTCCGATC*T |
| Nex_primer_02 | Primer:<br>indexed    | 3' phosphoro-thioate<br>bond | <u>CGATGT</u>    | CAAGCAGAAGACGGCATAACGAGAT <u>AC</u><br><u>ATCGGTGACTGGAGTTCAGACGTGTG</u><br>CTCTTCCGATC*T |
| Nex_primer_03 | Primer:<br>indexed    | 3' phosphoro-thioate<br>bond | <u>TTAGGC</u>    | CAAGCAGAAGACGGCATAACGAGAT <u>CC</u><br><u>CTAAGTGACTGGAGTTCAGACGTGTG</u><br>CTCTTCCGATC*T |
| Nex_primer_04 | Primer:<br>indexed    | 3' phosphoro-thioate<br>bond | <u>TGACCA</u>    | CAAGCAGAAGACGGCATAACGAGAT <u>TG</u><br><u>GTCAGTGACTGGAGTTCAGACGTGTG</u><br>CTCTTCCGATC*T |
| Nex_primer_05 | Primer:<br>indexed    | 3' phosphoro-thioate<br>bond | <u>ACAGTG</u>    | CAAGCAGAAGACGGCATAACGAGAT <u>CA</u><br><u>CTGTGTGACTGGAGTTCAGACGTGTG</u><br>CTCTTCCGATC*T |
| Nex_primer_06 | Primer:<br>indexed    | 3' phosphoro-thioate<br>bond | <u>GCCAAT</u>    | CAAGCAGAAGACGGCATAACGAGAT <u>AT</u><br><u>TGGCGTGACTGGAGTTCAGACGTGTG</u><br>CTCTTCCGATC*T |
| Nex_primer_07 | Primer:<br>indexed    | 3' phosphoro-thioate<br>bond | <u>CAGATC</u>    | CAAGCAGAAGACGGCATAACGAGAT <u>GA</u><br><u>TCTGGTGACTGGAGTTCAGACGTGTG</u><br>CTCTTCCGATC*T |
| Nex_primer_08 | Primer:<br>indexed    | 3' phosphoro-thioate<br>bond | <u>ACTTGA</u>    | CAAGCAGAAGACGGCATAACGAGAT <u>TC</u><br><u>AAGTGTGACTGGAGTTCAGACGTGTG</u><br>CTCTTCCGATC*T |

ChIP-nexus adapters are generated using the universal adapter (Nex\_adapter\_U) and the barcoded adapters (Nex\_adapter\_1, Nex\_adapter\_2, Nex\_adapter\_3, Nex\_adapter\_4). The universal (Nex\_primer\_U) and indexed (Nex\_primer\_01 - Nex\_primer\_08) primers are used for amplification of the library. Oligonucleotides can be ordered from Integrated DNA Technologies (IDT).



## Supplemental reference list

1. Ochoa-Espinosa, A., Yucel, G., Kaplan, L., Pare, A., Pura, N., Oberstein, A., Papatsenko, D., and Small, S. (2005). The role of binding site cluster strength in Bicoid-dependent patterning in *Drosophila*. *Proc Natl Acad Sci USA* 102, 4960–4965. 10.1073/pnas.0500373102.
2. Hannon, C.E., Blythe, S.A., and Wieschaus, E.F. (2017). Concentration dependent chromatin states induced by the bicoid morphogen gradient. *eLife* 6. 10.7554/eLife.28275.
3. Huang, J.D., Schwyter, D.H., Shirokawa, J.M., and Courey, A.J. (1993). The interplay between multiple enhancer and silencer elements defines the pattern of decapentaplegic expression. *Genes Dev.* 7, 694–704. 10.1101/gad.7.4.694.
4. Markstein, M., Zinzen, R., Markstein, P., Yee, K.-P., Erives, A., Stathopoulos, A., and Levine, M. (2004). A regulatory code for neurogenic gene expression in the *Drosophila* embryo. *Development* 131, 2387–2394. 10.1242/dev.01124.
5. Zeitlinger, J., Zinzen, R.P., Stark, A., Kellis, M., Zhang, H., Young, R.A., and Levine, M. (2007). Whole-genome ChIP-chip analysis of Dorsal, Twist, and Snail suggests integration of diverse patterning processes in the *Drosophila* embryo. *Genes Dev.* 21, 385–390. 10.1101/gad.1509607.
6. Perry, M.W., Boettiger, A.N., and Levine, M. (2011). Multiple enhancers ensure precision of gap gene-expression patterns in the *Drosophila* embryo. *Proc Natl Acad Sci USA* 108, 13570–13575. 10.1073/pnas.1109873108.
7. Hoch, M., Schröder, C., Seifert, E., and Jäckle, H. (1990). cis-acting control elements for Krüppel expression in the *Drosophila* embryo. *EMBO J.* 9, 2587–2595. 10.1002/j.1460-2075.1990.tb07440.x.
8. Häder, T., Wainwright, D., Shandala, T., Saint, R., Taubert, H., Brönner, G., and Jäckle, H. (2000). Receptor tyrosine kinase signaling regulates different modes of Groucho-dependent control of Dorsal. *Curr. Biol.* 10, 51–54. 10.1016/s0960-9822(99)00265-1.
9. Berger, M.F., Philippakis, A.A., Qureshi, A.M., He, F.S., Estep, P.W., and Bulyk, M.L. (2006). Compact, universal DNA microarrays to comprehensively determine transcription-factor binding site specificities. *Nat. Biotechnol.* 24, 1429–1435. 10.1038/nbt1246.
10. Sun, Y., Nien, C.-Y., Chen, K., Liu, H.-Y., Johnston, J., Zeitlinger, J., and Rushlow, C. (2015). Zelda overcomes the high intrinsic nucleosome barrier at enhancers during *Drosophila* zygotic genome activation. *Genome Res.* 25, 1703–1714. 10.1101/gr.192542.115.
11. Koenecke, N., Johnston, J., He, Q., Meier, S., and Zeitlinger, J. (2017). *Drosophila* poised enhancers are generated during tissue patterning with the help of repression. *Genome Res.* 27, 64–74. 10.1101/gr.209486.116.
12. Ajuria, L., Nieva, C., Winkler, C., Kuo, D., Samper, N., Andreu, M.J., Helman, A., González-Crespo, S., Paroush, Z., Courey, A.J., et al. (2011). Capicua DNA-binding sites are general response elements for RTK signaling in *Drosophila*. *Development* 138, 915–924. 10.1242/dev.057729.
13. Liaw, G.J., Steingrimsson, E., Pignoni, F., Courey, A.J., and Lengyel, J.A. (1993). Characterization of downstream elements in a Raf-1 pathway. *Proc Natl Acad Sci USA* 90, 858–862. 10.1073/pnas.90.3.858.
14. Ip, Y.T., Park, R.E., Kosman, D., Yazdanbakhsh, K., and Levine, M. (1992). dorsal-twist interactions establish snail expression in the presumptive mesoderm of the *Drosophila* embryo. *Genes Dev.* 6, 1518–1530. 10.1101/gad.6.8.1518.
